# Supplementary material for: Cyclooxygenase-2–Derived Prostaglandin E2 Activates β-Catenin in Human Cholangiocarcinoma Cells: Evidence for Inhibition of These Signaling Pathways by ω3 Polyunsaturated Fatty Acids
Source: Oxford University Press journal article supplement (doi:10.1158/0008-5472.can-07-2295), 2008-01-15
Supplement: 00085472can072295-sup-s_fig_legends_1-6.pdf [file 00085472can072295-sup-s_fig_legends_1-6.pdf]

## SUPPLEMENTARY FIGURE LEGENDS

### **Supplementary Figure 1. The effects of DHA, EPA and AA on cholangiocarcinoma cell viability.**

Equal numbers of human cholangiocarcinoma cells (CCLP1, SG231 and HuCCT1) ( $1 \times 10^4$ /well) were seeded onto the 96-well plates and cultured in the medium with 10% fetal bovine serum for 24 hr. The cells were washed twice with PBS and maintained in serum-free medium for 24 hr before treatment with DHA, EPA or AA for indicated concentrations and time periods. **(A)** The time-course effect of 20  $\mu$ M DHA, EPA or AA on the viability of CCLP1 cells. **(B-D)** The dose-dependent effect of DHA and EPA on cell viability at 24 hr time point in CCLP1 (B), SG231 (C) and HuCCT1 (D) cells. **(E)** Phase-contrast light microscopy showing the typical morphological changes of CCLP1 cells after treatment with 0-20  $\mu$ M DHA, EPA and AA for 24 hours (x 200).

### **Supplementary Figure 2. The effect of DHA, EPA and AA on the growth of primary biliary epithelial cells (BECs).**

Normal mouse primary BECs cultured on collagen gels were treated with 5  $\mu$ M or 20  $\mu$ M of AA, DHA or EPA for 24 hours. The numbers of viable cells were determined by cell counts with trypan blue exclusion. **(A)** Average numbers of viable cells for different treatment groups. The data were obtained from three separate experiments. Similar numbers of viable cells were found among different treatment groups. **(B)** Phase-contrast light microscopy showing the typical morphological changes of primary BECs after treatment with 20  $\mu$ M AA, DHA or EPA for 24 hours. Treatment with these fatty acids did not affect cell morphology.

### **Supplementary Figure 3. DHA inhibits GSK-3 $\beta$ phosphorylation in human cholangiocarcinoma cells.**

**(A)** DHA decreases the level of p-GSK-3 $\beta$ , but not p-Akt, in CCLP1 cells. The cells were treated with 60  $\mu$ M of DHA in serum free medium for indicated time periods. The cell lysates were obtained for Western blot analysis using antibodies against p-GSK-3 $\beta$  and GSK-3 $\beta$  as well as p-Akt as described in the Methods. **(B)** Inhibition of GSK-3 $\beta$  by SB216763 prevents DHA-induced reduction of  $\beta$ -catenin and c-Met. CCLP1 cells were pretreated with SB216763 (5  $\mu$ M) for 1 hr before DHA treatment (20  $\mu$ M) for 24 hr. The cell lysates were obtained for Western blot analysis using the antibodies against  $\beta$ -catenin and c-Met. **(C)** Inhibition of GSK-3 $\beta$  by SB216763 prevents DHA-mediated reduction of TCF/LEF reporter activity. CCLP1 cells transfected with the TCF/LEF reporter construct were treated with SB216763 (5  $\mu$ M) for 1 hr followed by DHA treatment (20  $\mu$ M) for 24 hr. The cell lysates were obtained to determine the luciferase activity. The data are presented as mean  $\pm$  SD of six independent experiments (\* $p < 0.01$ )

compared to control; \*\* $p < 0.01$  compared to DHA treatment). **(D)** SB216763 prevents DHA-induced caspase-9 activation and PARP cleavage in CCLP1 cells. The cells were pretreated with SB216763 (5  $\mu\text{M}$  for 1 hr) before treatment with DHA (20  $\mu\text{M}$ ) for 24 hr. The cell lysates were obtained for Western blot analysis using antibodies against PARP and caspase-9 as described in the Methods. **(E)** SB216763 prevents DHA-induced cell death. CCLP1 cells pretreated with SB216763 (5  $\mu\text{M}$ ) for 1 hr were incubated with DHA for 24 hr. The cell viability was determined using WST-1 assay. The data are presented as mean  $\pm$  SD of six independent experiments (\* $p < 0.01$  compared to control; \*\* $p < 0.01$  compared to DHA treatment).

**Supplementary Figure 4. Wnt3a-conditioned medium (Wnt3a-CM) partially protects DHA-induced reduction of  $\beta$ -catenin activation and restored cell survival in human cholangiocarcinoma cells.** **(A)** The effect of Wnt3a-CM on DHA-induced inhibition of TCF/LEF reporter activity. CCLP1 cells were transiently transfected with the TCF/LEF-Luc reporter vector. After transfection the cells were cultured with Wnt3a-CM (1:1 dilution with serum-free medium) or L-CM (control: 1:1 dilution with serum-free medium) containing 20  $\mu\text{M}$  DHA for 24hr. The cell lysates were then obtained to determine the luciferase activity. The data are presented as mean  $\pm$  SD of six independent experiments (\* $p < 0.01$  compared to control). **(B)** The effect of Wnt3a-CM on DHA-induced inhibition of cell growth. Equal numbers of CCLP1 cells ( $1 \times 10^4$ /cell) were seeded onto the 96-well plates and cultured in the medium with 10% fetal bovine serum for 24 hr. The cells washed twice with PBS and then treated with different concentration of Wnt3a-CM or L-CM (control) containing 20  $\mu\text{M}$  DHA for 24 hr (Wnt3a-CM was diluted with serum-free medium). Wnt3a-conditioned medium partially protects DHA-induced cytotoxicity in a dose-dependent manner. The data are presented as mean  $\pm$  SD of 6 independent experiments.

**Supplementary Figure 5. DHA induces the expression of 15-hydroxyprostaglandin dehydrogenase (15-PGDH) in human cholangiocarcinoma cells.** **(A)** The effect of DHA versus AA on 15-PGDH expression in CCLP1 cells. The cells were treated with DHA (20  $\mu\text{M}$ ) or AA (20  $\mu\text{M}$ ) in serum-free medium for 24 hr and the cell lysates were obtained for Western blot analysis using 15-PGDH antibody. **(B-D)** Different concentrations of DHA on 15-PGDH expression in CCLP1 **(B)**, SG231 **(C)** and HuCCT1 **(D)** cells.

**Supplementary Figure 6. DHA prevents PGE<sub>2</sub>-induced GSK- $\beta$  phosphorylation and dissociation from Axin in CCLP1 cells.** **(A)** DHA prevents PGE<sub>2</sub>-induced GSK-3 $\beta$  phosphorylation. CCLP1 cells were treated with PGE<sub>2</sub> (10  $\mu\text{M}$ ) or vehicle in the absence or presence of DHA (60  $\mu\text{M}$ ) in serum-free

medium for 1 hr. The cell lysates were obtained for SDS-PAGE and Western blotting to detect p-GSK-3 $\beta$ . **(B)** DHA prevents PGE<sub>2</sub>-induced GSK-3 $\beta$  dissociation from Axin. CCLP1 cells were treated with PGE<sub>2</sub> (10  $\mu$ M) or vehicle in the absence or presence of DHA (60  $\mu$ M) in serum-free medium for 1 hr. The cell lysates were obtained for immunoprecipitation with anti-Axin antibody followed by immunoblotting with antibodies against GSK-3 $\beta$  and Axin. **(C)** DHA inhibits PGE<sub>2</sub>-induced TCF/LEF reporter activity. CCLP1 cells were transfected with TCF/LEF-Luc reporter vector. After transfection the cells were treated with PGE<sub>2</sub> with or without DHA in the serum-free medium for 24 hr. The cell lysates were obtained to determine the luciferase activity. The data are presented as mean  $\pm$  SD of six independent experiments. DHA treatment significantly decreased TCF/LEF reporter activity (\*p<0.01 compared to control; \*\*p<0.01 compared to PGE<sub>2</sub> treatment).
