# Supplementary figures and images for: Cyclooxygenase-2–Derived Prostaglandin E2 Activates β-Catenin in Human Cholangiocarcinoma Cells: Evidence for Inhibition of These Signaling Pathways by ω3 Polyunsaturated Fatty Acids
Source: Oxford University Press journal article supplement (doi:10.1158/0008-5472.can-07-2295), 2008-01-15

# Supplementary Fig. 1

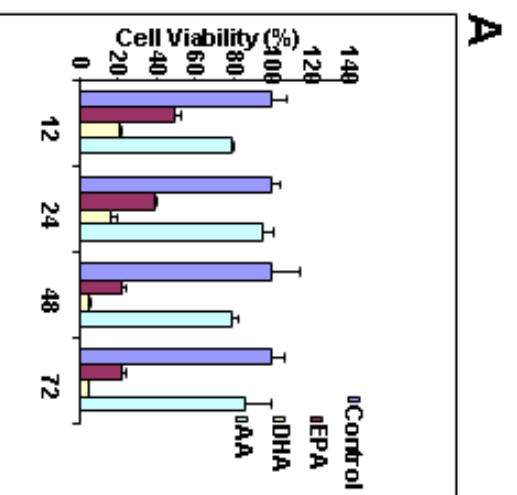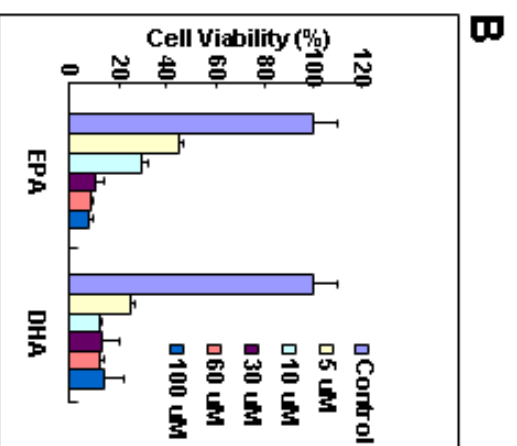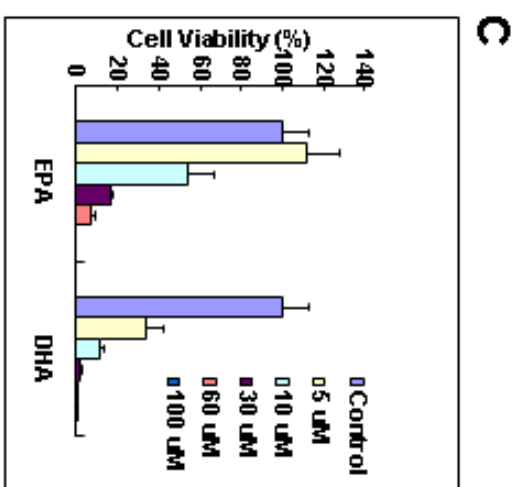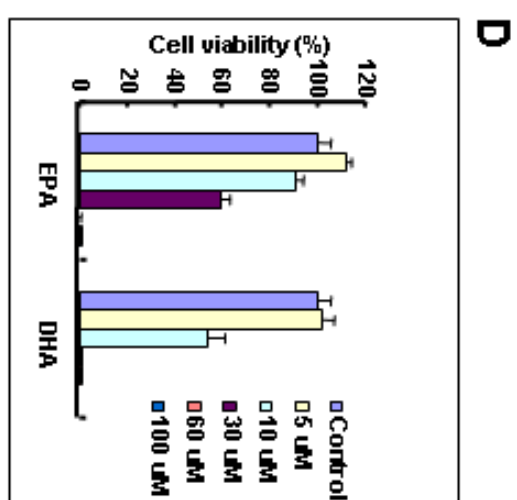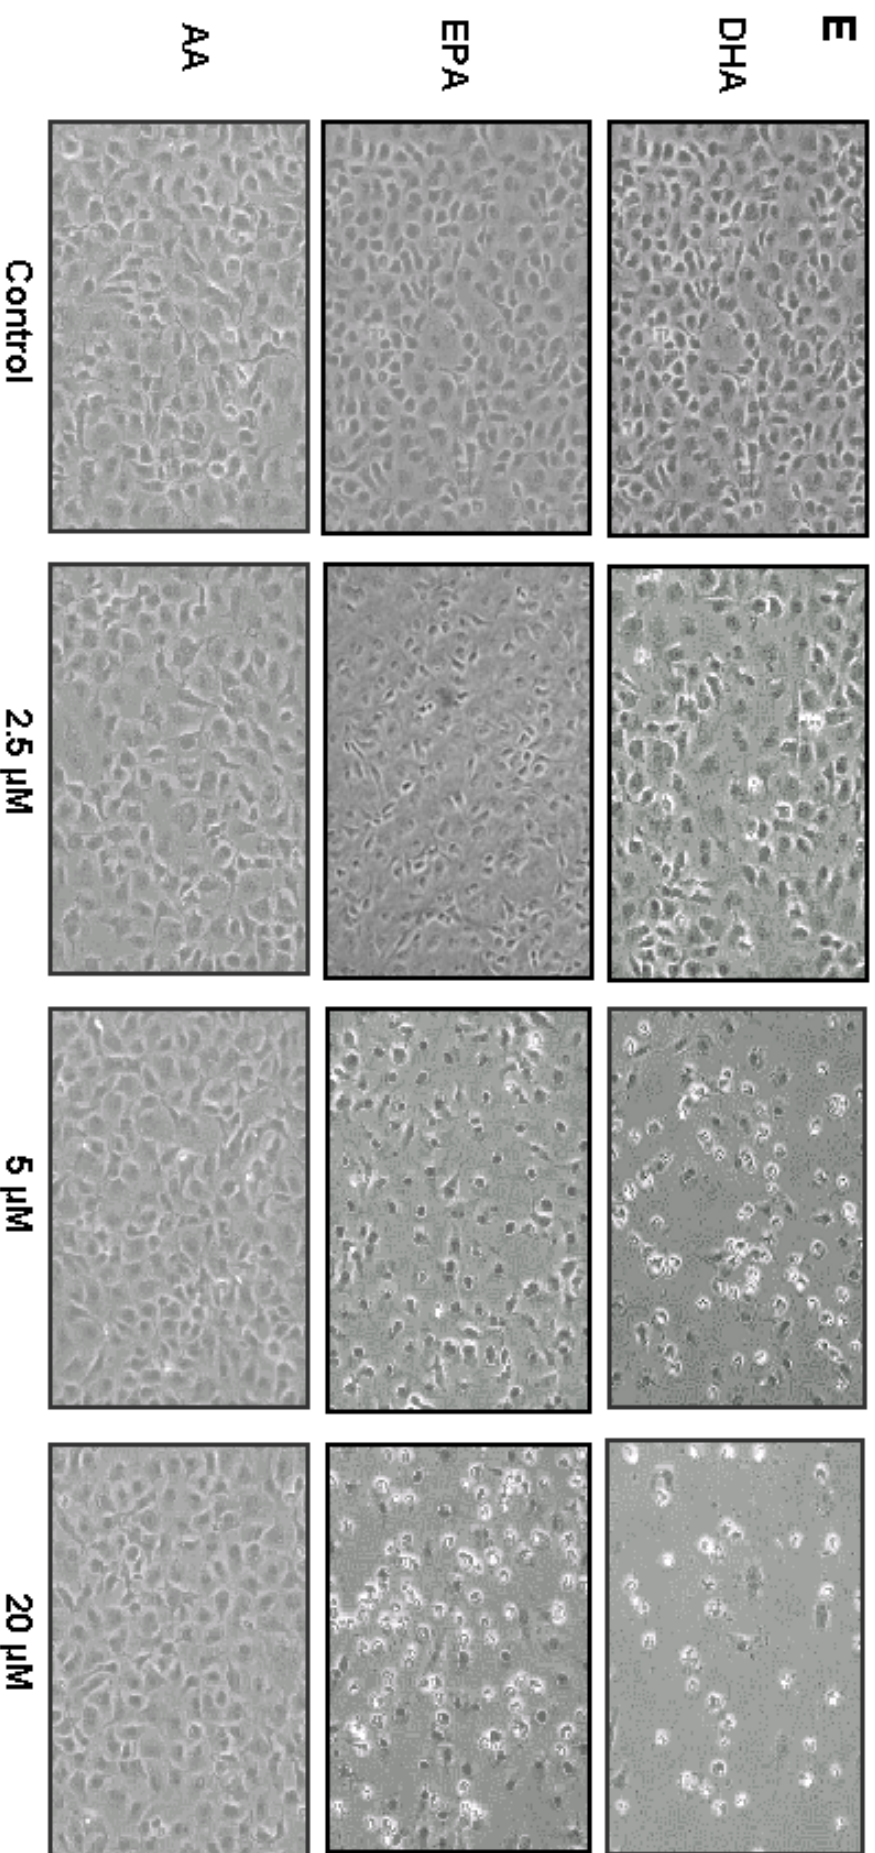

Supplement: 00085472can072295-sup-s_fig_1.pdf [file 00085472can072295-sup-s_fig_1.pdf]

Supplementary Fig. 4

A

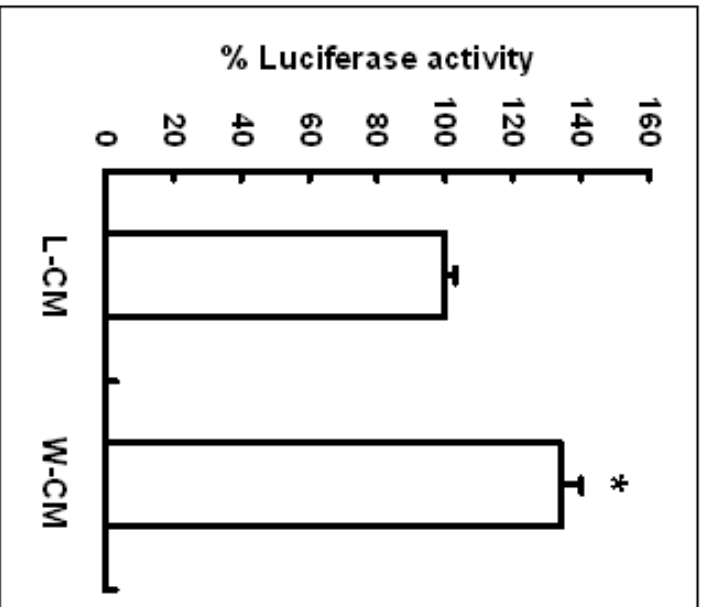

B

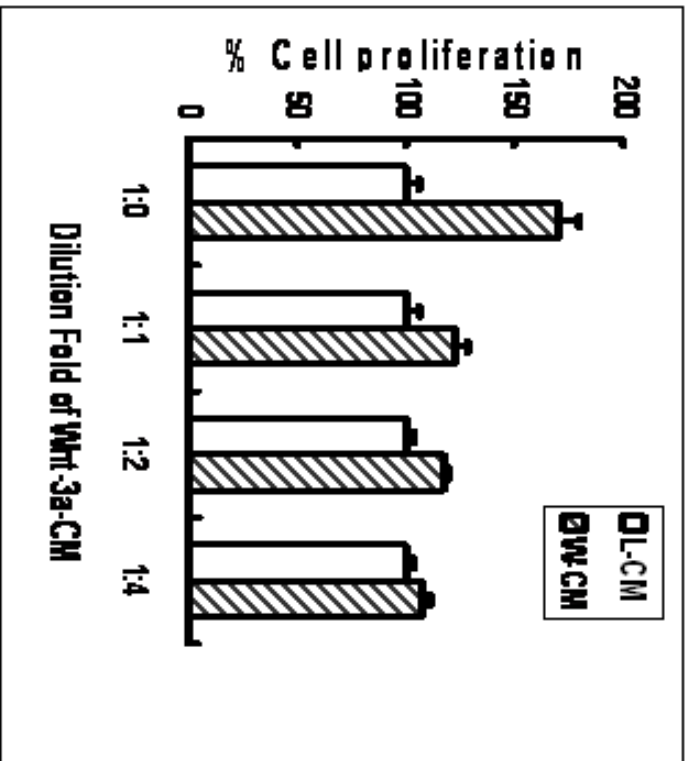

Supplement: 00085472can072295-sup-supl_fig_4.pdf [file 00085472can072295-sup-supl_fig_4.pdf]

## Supplementary Fig. 2

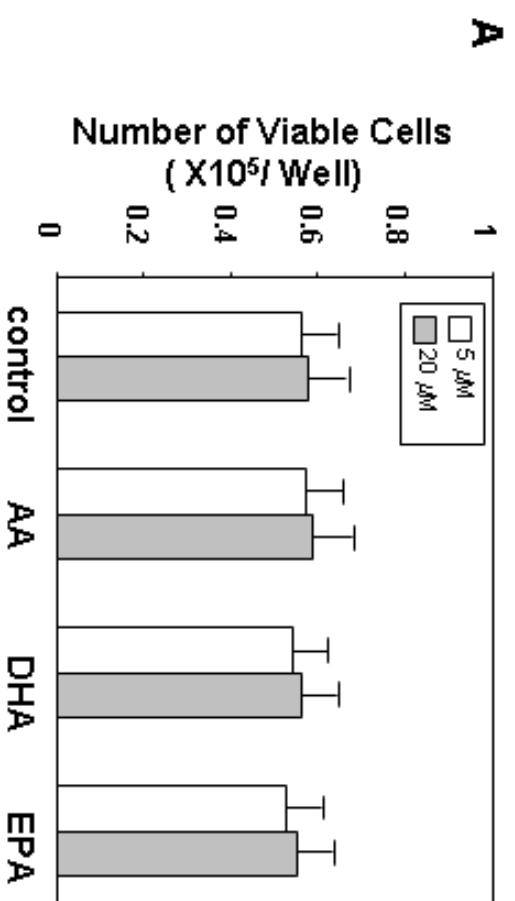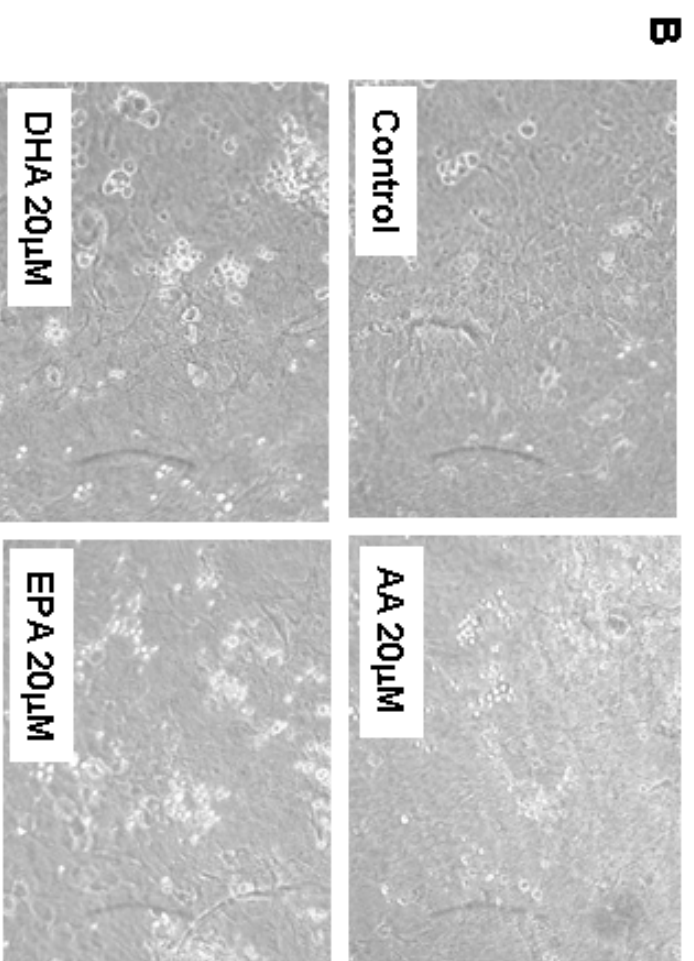

Supplement: 00085472can072295-sup-suppl_fig_2.pdf [file 00085472can072295-sup-suppl_fig_2.pdf]

# Supplementary Fig. 3

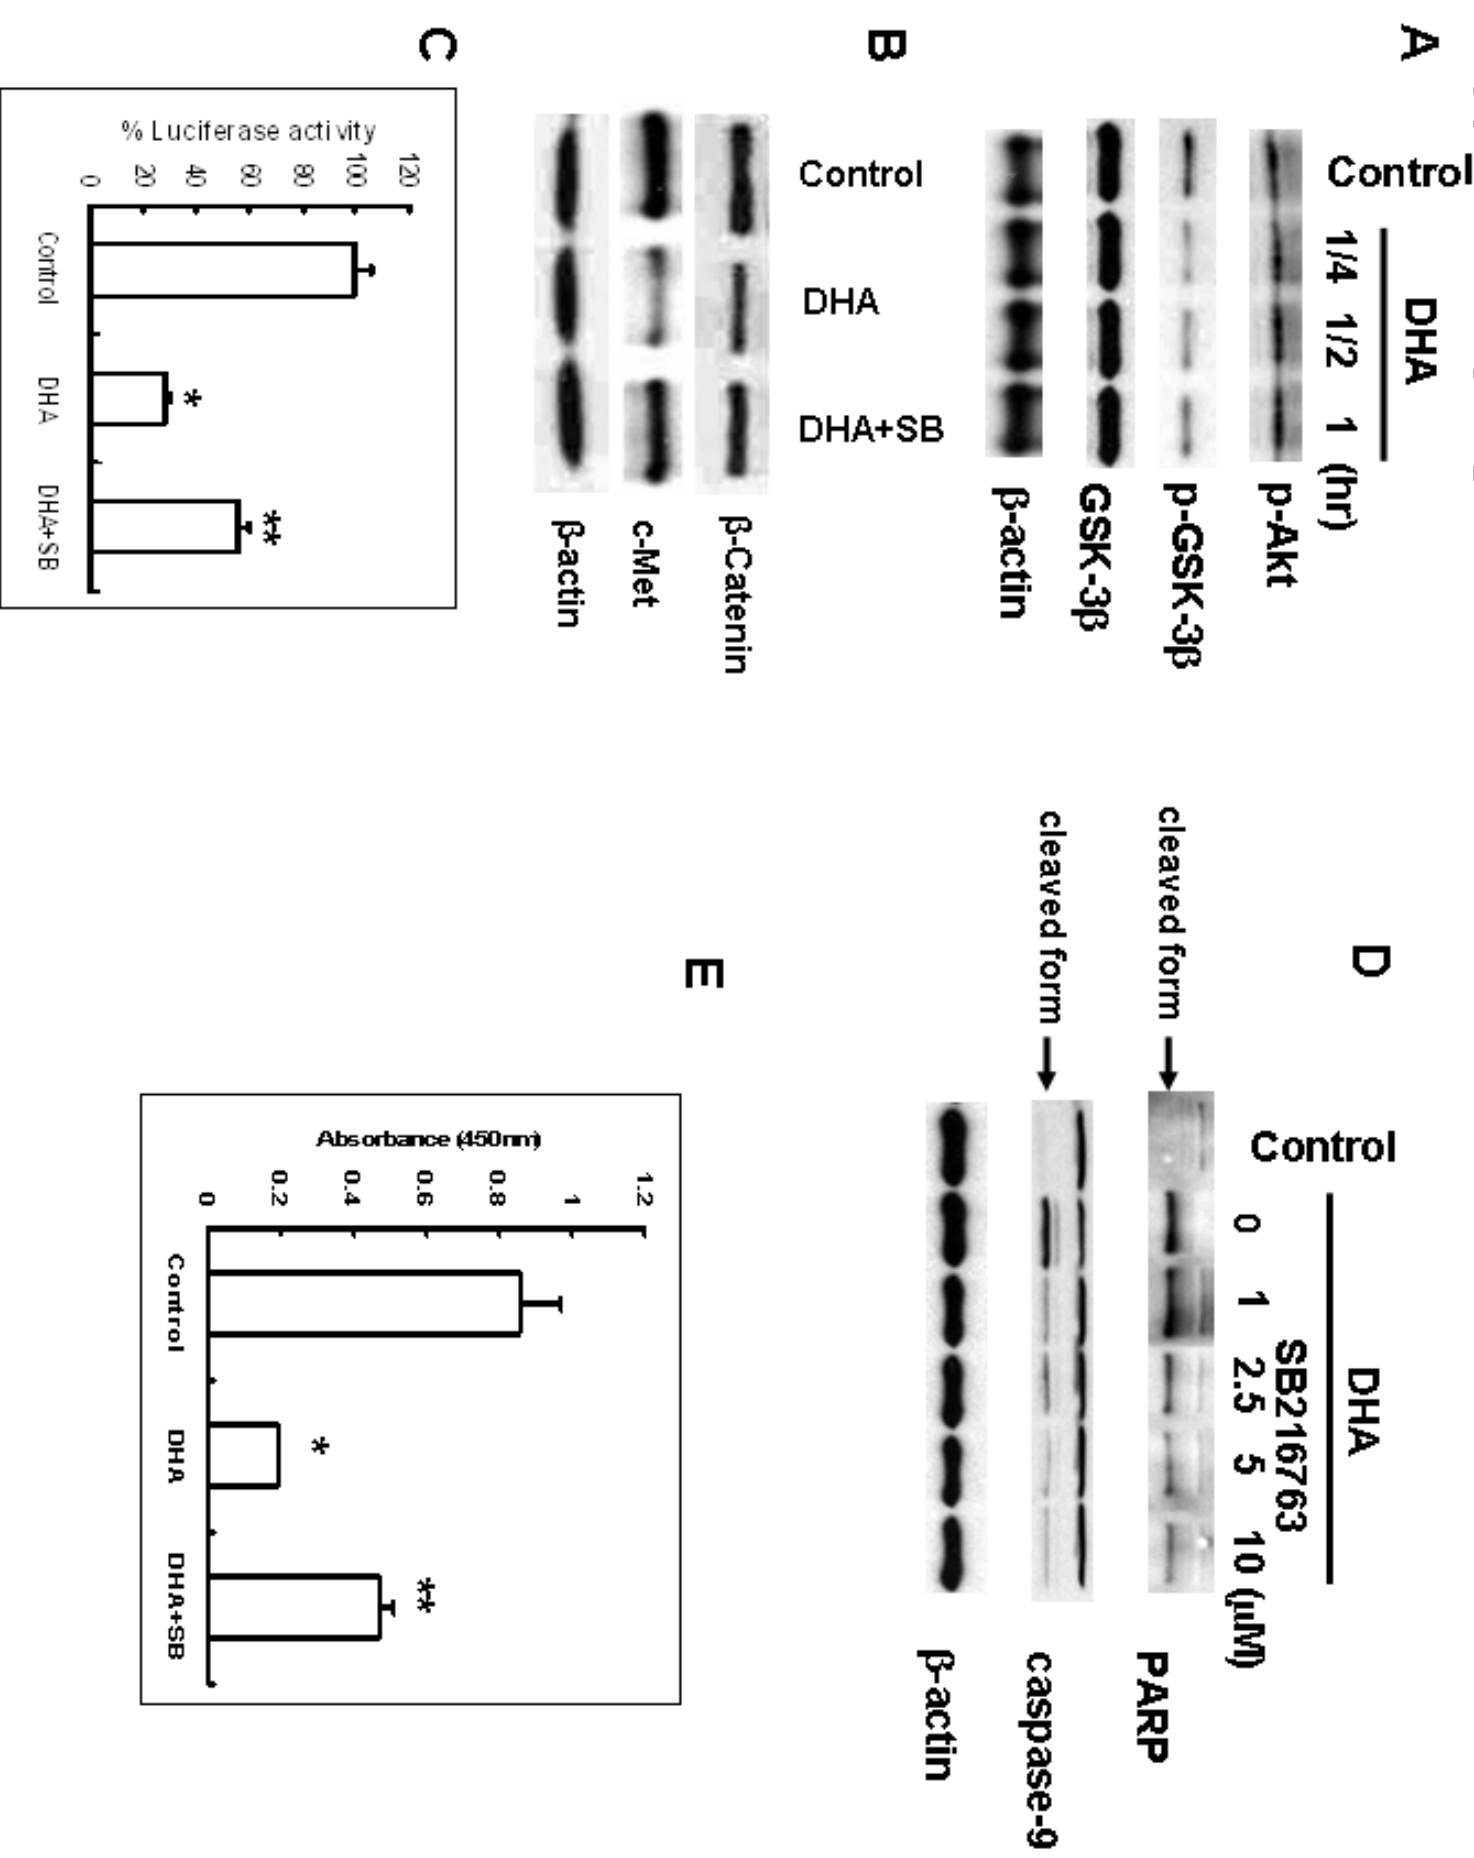

Supplement: 00085472can072295-sup-suppl_fig_3.pdf [file 00085472can072295-sup-suppl_fig_3.pdf]

Supplementary Fig. 5

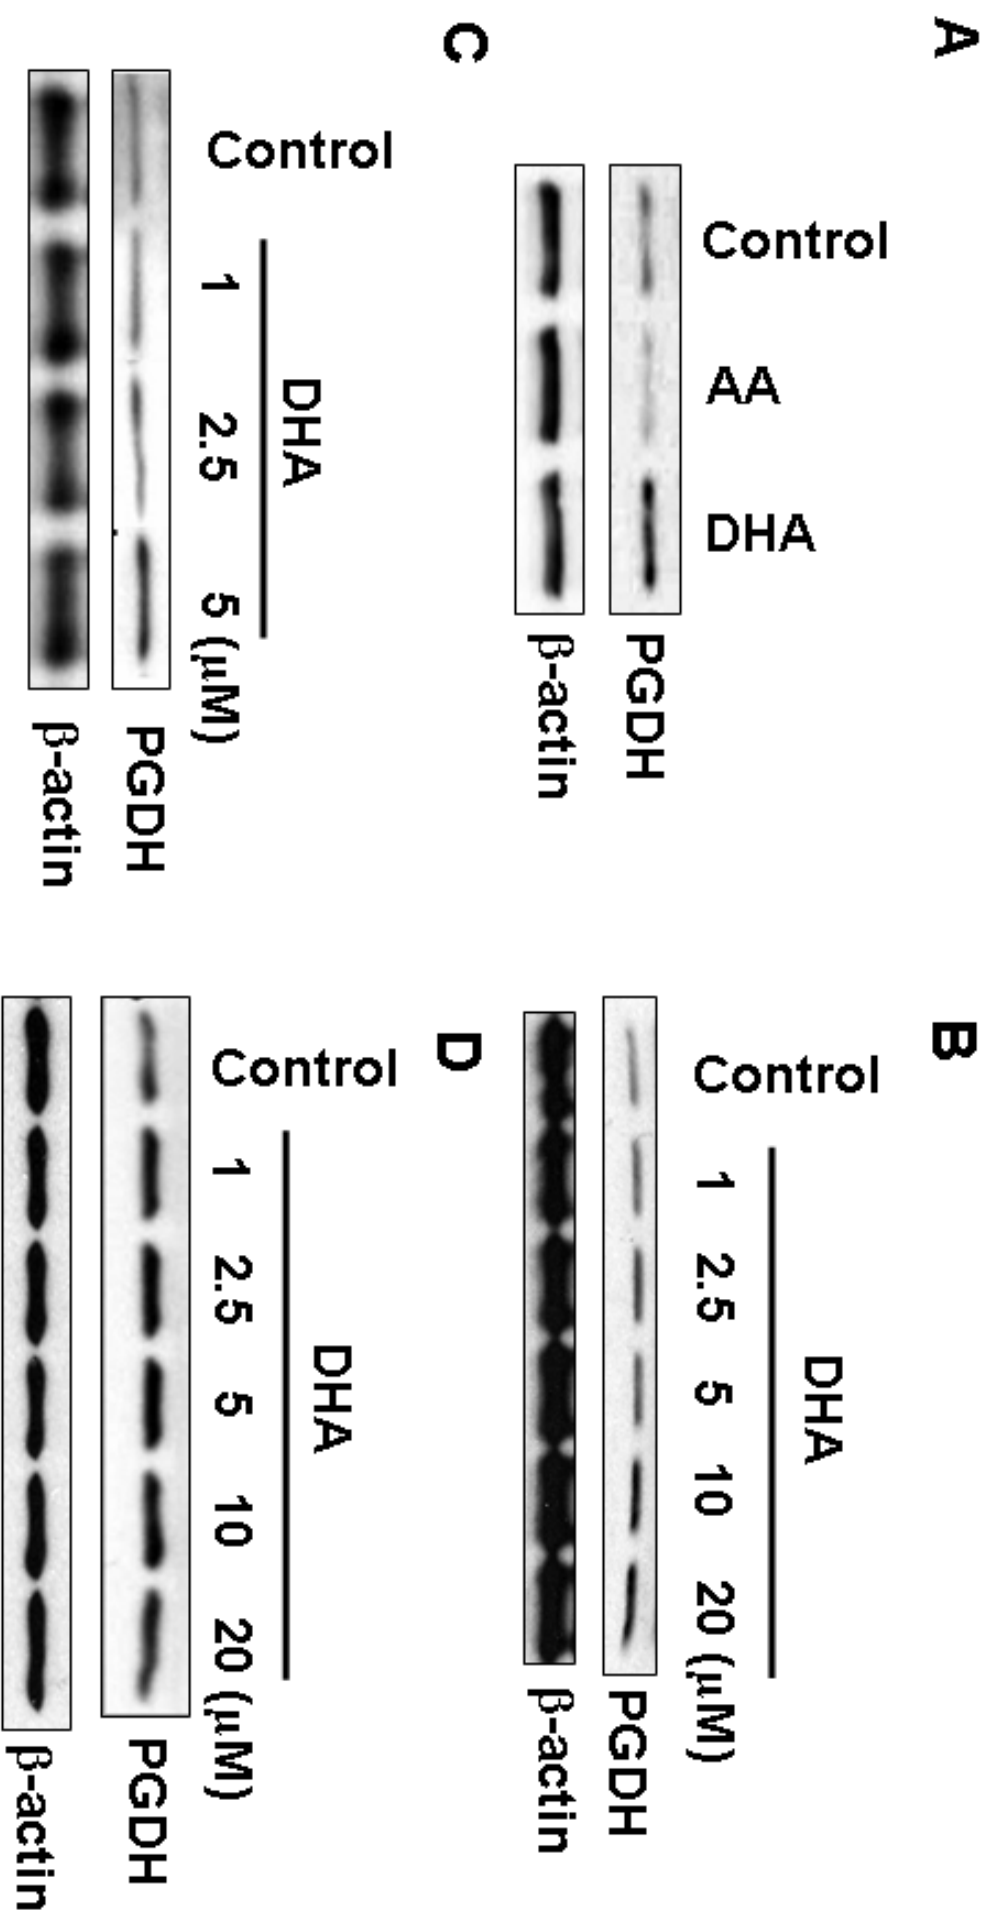

Supplement: 00085472can072295-sup-suppl_fig_5.pdf [file 00085472can072295-sup-suppl_fig_5.pdf]

# Supplementary Fig. 6

## A

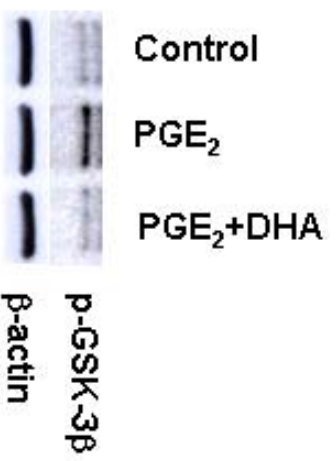

## B

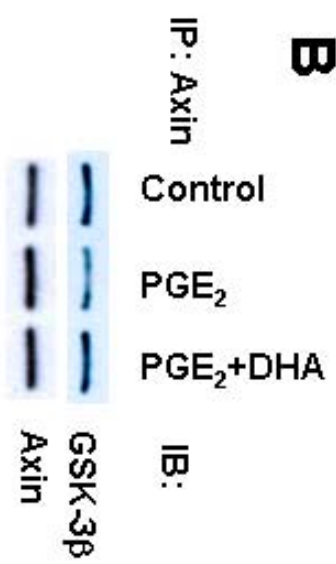

## C

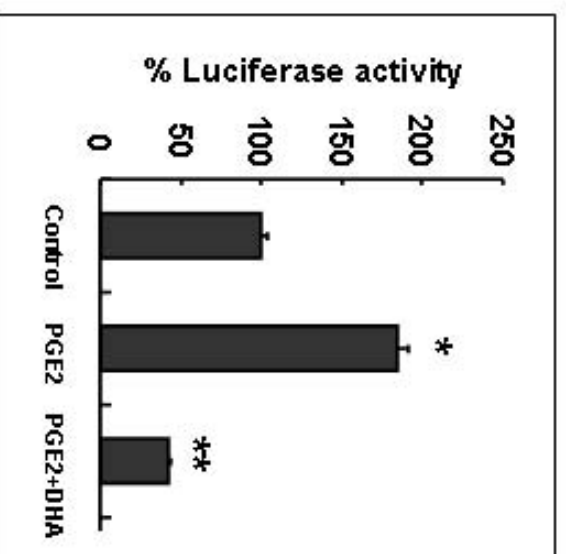

Supplement: 00085472can072295-sup-suppl_fig_6.pdf [file 00085472can072295-sup-suppl_fig_6.pdf]
